# Supplementary material for: Awareness, treatment, and control of hypertension and related factors in adult Iranian population
Source: Springer Nature journal article supplement (doi:10.1186/s12889-020-08831-1), 2020-05-12
Supplement: MOESM1 [file 17976046]

## Yazd Health Study Questionnaire

### Instructions:

- Please do not interview unless the informed consent signed by the interviewee
- Please do not ask the sensitive questions in front or near others
- Each question has one choice unless marked with\*
- Marked questions can take up to three choices

|                                                                                                                                                                                                                                                     |
|-----------------------------------------------------------------------------------------------------------------------------------------------------------------------------------------------------------------------------------------------------|
| 1. Age group: 1) 20-29 2) 30-39 3) 40-49 4) 50-59 5) 60-69                                                                                                                                                                                          |
| 2. Sex: 1) Male 2) Female                                                                                                                                                                                                                           |
| 3. Length of stay in the present residential: 1) Less than 1 year 2) 2-5 years 3) 6-10 years 4) 11-15 years 5) more than 15 years                                                                                                                   |
| 4. Are you a native of Yazd? 1) Yes >>>>> go to question 6 2) No                                                                                                                                                                                    |
| 5. If you are not a native of Yazd, where are you from? 1) other cities of Yazd province 2) Neighboring provinces 3) Other provinces 4) Other countries                                                                                             |
| 6. The respondent's education level: 1) Illiterate 2) Junior high school 3) High school diploma or associates degree 4) Bachelor's degree 5) Masters degree or higher                                                                               |
| 7. The number of household members (including the interviewee): 1) 2 2) 3 3) 4 4) 5 5) 6 and more                                                                                                                                                   |
| 8. Marital status: 1) Married 2) Single 3) Widowed 4) Divorced                                                                                                                                                                                      |
| 9. Systolic blood pressure (mm Hg) (based on measurements): 1) Below 90 2) 90-119 3) 120-139 4) 140-159 5) 160 and above                                                                                                                            |
| 10. Diastolic blood pressure (mm Hg) (based on measurements): 1) Below 70 2) 70-79 3) 80-89 4) 90-99 5) 100 and above                                                                                                                               |
| 11. Range of body mass index (based on measurements): 1) Less than 18.5 2) 18.5-24.9 3) 25-29.9 4) 30-39.9 5) 40 and above                                                                                                                          |
| A) Physical activity questions                                                                                                                                                                                                                      |
| 12. How often do you do vigorous physical activity, such as running or heavy physical work (where your heart rate rises or you sweat)?<br>1) Never 2) Once a week 3) Twice a week 4) Three to four times a week 5) Five or more times a week        |
| 13. How long does each of your vigorous physical activity sessions last (minutes) ? 1) Less than 10 minutes 2) 10-20 minutes 3) 20-30 minutes 4) 30-60 minutes 5) More than 60 minutes                                                              |
| 14. How often do you do moderate physical activity, such as moderate activities and fast walking (where you sweat a little or do not get tired)? 1) Never 2) Once a week 3) Twice a week 4) Three or four times a week 5) Five or more times a week |
| 15. How long does each of your moderate physical activity sessions last (minutes) ? 1) Less than 10 minutes 2) 10-20 minutes 3) 20-30 minutes 4) 30-60 minutes 5) More than 60 minutes                                                              |
| 16. How often do you do low physical activities, such as slow walking or sedentary works (where you make little effort or do not sweat)? 1) Never 2) Once a week 3) Twice a week 4) Three or four times a week 5) Five or more times a week         |
| 17. How long does each of your low physical activity sessions last (minutes) ? 1) Less than 10 minutes 2) 10-20 minutes 3) 20-30 minutes 4) 30-60 minutes 5) More than 60 minutes                                                                   |

## B - Sleep status questions

|                                                                                                                                                                                                 |
|-------------------------------------------------------------------------------------------------------------------------------------------------------------------------------------------------|
| 18. In the past month, what time did you usually go to bed at night? 1) 8-9 pm 2) 10-11 pm 3) 12 pm -1 am 4) 2-3 am 5) After 3 am                                                               |
| 19. In the past month, what time did you usually wake up in the morning? 1) 4-5 am 2) 6-7 am 3) 8-9 am 4) 10-11 am 5) After 11 am                                                               |
| 20. In the past month, how long did you actually sleep through the day? 1) Less than 5 hours 2) 6-7 hours 3) 8-10 hours 4) More than 10 hours                                                   |
| 21. In the past month, how long did it usually take you to sleep at night? 1) Immediately 2) Less than 15 minutes 3) 15-30 minutes 4) 30-60 minutes 5) More than 60 minutes                     |
| 22. In the past month, how often did you use sleeping pills or tranquilizers to sleep?<br>1) I had no experience 2) Less than once a week 3) Once or twice a week 4) Three or more times a week |
| 23. In the past month, how often could you not fall asleep within 30 minutes? 1) I had no experience 2) Less than once a week 3) Once or twice a week 4) Three or more times a week             |
| 24. In the past month, how often did you wake up at midnight to go to toilet? 1) I had no experience 2) Less than once a week 3) Once or twice a week 4) Three or more times a week             |
| 25. In the past month, how often did you wake up at night or early in the morning? 1) I had no experience 2) Less than once a week 3) Once or twice a week 4) Three or more times a week        |
| 26. In the past month, how often did you have nightmares? 1) I had no experience 2) Less than once a week 3) Once or twice a week 4) Three or more times a week                                 |
| 27. How many hours a day do you usually watch TV?<br>1) Less than 1 hour 2) 1-3 hours 3) 4-6 hours 4) More than 6 hours 5) Not at all                                                           |
| 28. How many hours a day do you usually watch satellite, television, or movies?<br>1) Less than 1 hour 2) 1-3 hours 3) 4-6 hours 4) More than 6 hours 5) Not at all                             |

## C - Mental health

|                                                                                                                                                                              |
|------------------------------------------------------------------------------------------------------------------------------------------------------------------------------|
| 29. In the past week, how much time did you spend with your family and friends?<br>1) Not at all 2) 1-3 hours 3) 4-7 hours 4) 8-12 5) More than 12 hours                     |
| 30. In the past week, how long did you talk with your family and friends on the phone or mobile phone? 1) Not at all 2) 1-3 hours 3) 4-7 hours 4) 8-12 5) More than 12 hours |
| 31. In the past week, how long did you spend in religious and social groups?<br>1) Not at all 2) 1-3 hours 3) 4-7 hours 4) 8-12 5) More than 12 hours                        |
| 32. How many close friends (to whom you could say your secrets), except for your family members, do you have? 1) 1-2 2) 3-4 3) 5-6 4) More than 6 5) Not at all              |

## Mental status questions:

Some sentences that people have used to introduce you have been gathered below. Read all the sentences to the respondents and according to the following scale, write the number that indicates how the person feels at the moment. There are no right or wrong answers.

Do not spend a lot of time for each sentence. Submit a response that seems to best describe how the person feels at the moment.

| Sentences                                                                  |               |             |                |             |
|----------------------------------------------------------------------------|---------------|-------------|----------------|-------------|
| 33. It is difficult for me to stay calm.                                   | 1) Not at all | 2) Somewhat | 3 moderately ) | 4) too much |
| 34. I noticed that my mouth is dry.                                        | 1) Not at all | 2) Somewhat | 3) moderately  | 4) too much |
| 35. I do not think I can feel good experience.                             | 1) Not at all | 2) Somewhat | 3 moderately   | 4) too much |
| 36. I had trouble breathing.                                               | 1) Not at all | 2) Somewhat | 3 moderately   | 4) too much |
| 37. It is difficult to volunteer for work.                                 | 1) Not at all | 2) Somewhat | 3 moderately   | 4) too much |
| 38. In my situation, I reacted wildly.                                     | 1) Not at all | 2) Somewhat | 3 moderately   | 4) too much |
| 39. I feel the tremor in my body.                                          | 1) Not at all | 2) Somewhat | 3 moderately   | 4) too much |
| 40. I feel I use a lot of mental energy.                                   | 1) Not at all | 2) Somewhat | 3 moderately   | 4) too much |
| 41. I am worried about my panic or stupid actions in some situations.      | 1) Not at all | 2) Somewhat | 3 moderately   | 4) too much |
| 42. I feel I do not have something that I have been waiting for it.        | 1) Not at all | 2) Somewhat | 3 moderately   | 4) too much |
| 43. I feel I am distressed and quandary.                                   | 1) Not at all | 2) Somewhat | 3 moderately   | 4) too much |
| 44. Calmness and serenity is difficult for me.                             | 1) Not at all | 2) Somewhat | 3 moderately   | 4) too much |
| 45. I feel heart dead and heart broken.                                    | 1) Not at all | 2) Somewhat | 3 moderately   | 4) too much |
| 46. I do not keep patience in confront to anything that limit my work.     | 1) Not at all | 2) Somewhat | 3 moderately   | 4) too much |
| 47. I feel that I may fear at any moment.                                  | 1) Not at all | 2) Somewhat | 3 moderately   | 4) too much |
| 48. I am not able to show my enthusiasm about many things.                 | 1) Not at all | 2) Somewhat | 3 moderately   | 4) too much |
| 49. I feel I am not highly valuable as an individual.                      | 1) Not at all | 2) Somewhat | 3 moderately   | 4) too much |
| 50. I think I am very irritable and sensitive.                             | 1) Not at all | 2) Somewhat | 3 moderately   | 4) too much |
| 51. Without any physical activity, I notice that my heart works unusually. | 1) Not at all | 2) Somewhat | 3 moderately   | 4) too much |

|                                                                   |               |             |              |             |
|-------------------------------------------------------------------|---------------|-------------|--------------|-------------|
| (e.g., rapid heartbeat or I feel heart failure for some moments). |               |             |              |             |
| 52. I fear with no acceptable reasons.                            | 1) Not at all | 2) Somewhat | 3 moderately | 4) too much |
| 53. I feel that life is meaningless.                              | 1) Not at all | 2) Somewhat | 3 moderately | 4) too much |

D - Questions about quality of life:

|                                                                                                                                                                                                                        |
|------------------------------------------------------------------------------------------------------------------------------------------------------------------------------------------------------------------------|
| 54. How do you assess your health status in the past month? 1) Very good 2) Good 3) Intermediate 4) Bad 5) Very bad                                                                                                    |
| 55. In the past month, how much have your physical activities (such as climbing stairs or walking) been limited due to physical health problems? 1) Not at all 2) Very low 3) Somewhat 4) A lot 5) I could not move    |
| 56. In the past month, how much have your daily works inside and outside the house been limited due to physical health problems? 1) Not at all 2) Very low 3) Somewhat 4) A lot 5) I could not move                    |
| 57. How much bodily pain have you had during the past month? 1) Not at all 2) Very low 3) Somewhat 4) A lot 5) too much                                                                                                |
| 58. How much bodily energy did you have during the past month? 1) too much 2) A lot 3) Somewhat 4) Low 5) Not at all                                                                                                   |
| 59. Over the past month, how much physical and mental problems have restricted your social relationships with your family and friends? 1) Not at all 2) Very low 3) Somewhat 4) A lot 5) I could not have relationship |
| 60. Over the past month, how much have mental problems, such as anxiety and depression, hurt you? 1) Not at all 2) Very low 3) Somewhat 4) A lot 5) too much                                                           |
| 61. Over the past month, how much have physical and mental problems restricted your daily activities? 1) Not at all 2) Very low 3) Somewhat 4) A lot 5) I could not do my daily activities                             |

E- Questions about chronic diseases:

Which of the following diseases has been diagnosed by your doctor?

|                                                                                                                                                                           |
|---------------------------------------------------------------------------------------------------------------------------------------------------------------------------|
| 62. Heart disease 1) Yes 2) No >>>>> Go to question 70                                                                                                                    |
| 63. If yes, what type?<br>1) Valvular heart disease 2) Heart failure 3) Irregular heartbeat (arrhythmia) 4) Intra-aortic angioplasty 5) Open-heart surgery                |
| 64. In case of having any of the above diseases, how many years ago did it start? 1) Less than 1 year 2) 1-2 years 3) 3-4 years 4) 5-6 years 5) 7 or more years ago       |
| 65. When was the last time you went to a doctor for your disease? 1) Less than 1 month ago 2) 1-3 months ago 3) 4-5 months ago 4) 6-12 months ago 5) More than 1 year ago |
| 66. Have you ever felt pain, discomfort, or pressure and heaviness in your chest or under the breast bone? 1) Yes 2) No                                                   |
| 67. Do you have pain in your chest when you walk slowly or quickly or go up the hill? 1) Yes 2) No                                                                        |
| 68. Does your pain goes away when you change your                                                                                                                         |

|                                                                                                                                                                                                            |
|------------------------------------------------------------------------------------------------------------------------------------------------------------------------------------------------------------|
| situation (standing, sitting, or walking slower) or use sublingual tabs? 1) Yes 2) No                                                                                                                      |
| 69. Is the pain eliminated in less than 10 minutes? 1) Yes 2) No                                                                                                                                           |
| 70. Do your first degree relatives (father, mother, sister, brother, children) have a history of heart disease? 1) Yes 2) No                                                                               |
| 71. High blood pressure (hypertension)? 1) Yes 2) No >>> Go to question 77                                                                                                                                 |
| 72. If you have the disease, how many years ago did it start? 1) Less than one year ago 2) 1-2 years ago 3) 3-4 years ago 4) 5-6 years ago 5) 7 or more years ago                                          |
| 73. When was the last time you went to a doctor for your disease? 1) Less than a month ago 2) 1-3 months ago 3) 4 to 6 months ago 4) 6 months to a year ago 5) Over a year ago                             |
| 74. Do your first degree relatives (father, mother, sister, brother, children) have a history of high blood pressure (hypertension)? 1. Yes 2. No                                                          |
| 75. Do you have a history of mental illness? 1) Yes 2) No                                                                                                                                                  |
| 76. If yes, what type? 1) Cerebral hemorrhage 2) Strokes 3) Seizure 4) Brain Cancer 5) Other                                                                                                               |
| 77. Do your first degree relatives (father, mother, sister, brother, children) have a history of mental illness? 1) Yes 2) No                                                                              |
| 78. Do you have nocturnal snoring problem? 1) Yes 2) No                                                                                                                                                    |
| 79. Do you have a family history of sudden death? 1) Yes 2) No                                                                                                                                             |
| 80. Diabetes: 1) Yes 2) No >> Go to question 88                                                                                                                                                            |
| 81. If you have the disease, how many years ago did it start? 1) Less than one year ago 2) 1-2 years ago 3) 3-4 years ago 4) 5-6 years ago 5) 7 or more years ago                                          |
| 82. Which method do you use to control diabetes? 1) Dietary 2) Herbal extract 3) Tablets 4) Insulin 5) None                                                                                                |
| 83. Do you take medicine for diabetes regularly? 1) Yes 2) No                                                                                                                                              |
| 84. If you use insulin, how many years after the diagnosis did you start taking it? 1) Immediately 2) 6 months to a year 3) 1 to 3 years 4) 3 to 10 years 5) More than ten years                           |
| 85. When was the last time you went to a doctor for your disease? 1) 3 to 6 months ago 2) 7 months to one year ago 3) 2 to 3 years ago 4) 4 to 10 years ago 5) More than ten years ago                     |
| 86. What type of physician did you refer to? 1) General 2) Additional domestic specialists 3) Endocrinologist                                                                                              |
| 87. Which of diabetes complications appeared to you at first? 1) Gestational diabetes 2) Ocular complications of diabetes 3) Renal complications of diabetes 4) Diabetic foot 5) Wounds caused by diabetes |
| 88. Do your first degree relatives (father, mother, sister, brother, children) have a history of this disease? 1) Yes 2) No                                                                                |
| 89. Increased blood cholesterol 1) Yes 2) No >>> Go to question 92                                                                                                                                         |
| 90. If you have the disease, how many years ago did it start? 1) Less than one year ago 2) 1-2 years ago 3) 3-4 years ago 4) 5-6 years ago 5) 7 or more years ago                                          |
| 91. When was the last time you went to a doctor for your disease? 1) Less than a month ago 2) 2 to 3 months ago 3) 4 to 6 months ago 4) 7 months to one year ago 5) More than a year ago                   |
| 92. Do your first degree relatives (father, mother, sister, brother, children) have a history of this disease? 1) Yes 2) No                                                                                |
| 93. Blood coagulation problems 1. Yes 2. No >>> Go to question 97                                                                                                                                          |

|                                                                                                                                                                                           |
|-------------------------------------------------------------------------------------------------------------------------------------------------------------------------------------------|
| 94. If you have the disease, how many years ago did it start? 1) Less than one year ago 2) 1-2 years ago 3) 3-4 years ago 4) 5-6 years ago 5) 7 or more years ago                         |
| 95. When was the last time you went to a doctor for your disease? 1) Less than a month ago 2) 2 to 3 months ago 3) 4 to 6 months ago 4) 7 months to one year ago 5) More than a year ago  |
| 96. Do you take medicine to control the clotting regularly? 1) Yes 2) No                                                                                                                  |
| 97. Do your first degree relatives (father, mother, sister, brother, children) have a history of this disease? 1) Yes 2) No                                                               |
| 98. Asthma 1) Yes 2) No >>> Go to question 101                                                                                                                                            |
| 99. If you have the disease, how many years ago did it start? 1) Less than one year ago 2) 1-2 years ago 3) 3-4 years ago 4) 5-6 years ago 5) 7 or more years ago                         |
| 100. When was the last time you went to a doctor for your disease? 1) Less than a month ago 2) 2 to 3 months ago 3) 4 to 6 months ago 4) 7 months to one year ago 5) More than a year ago |
| 101. Do your first degree relatives (father, mother, sister, brother, children) have a history of this disease? 1) Yes 2) No                                                              |
| 102. Thyroid problems 1) Yes 2) No >>> Go to question 106                                                                                                                                 |
| 103. What type of thyroid problems do you have? 1) Hypothyroidism 2) Hyperthyroidism 3) Goiter 4) Malignant (cancerous)                                                                   |
| 104. If you have the disease, how many years ago did it start? 1) Less than one year ago 2) 1-2 years ago 3) 3-4 years ago 4) 5-6 years ago 5) 7 or more years ago                        |
| 105. When was the last time you went to a doctor for your disease? 1) Less than a month ago 2) 2 to 3 months ago 3) 4 to 6 months ago 4) 7 months to one year ago 5) More than a year ago |
| 106. Do your first degree relatives (father, mother, sister, brother, children) have a history of this disease? 1) Yes 2) No                                                              |
| 107. Depression 1) Yes 2) No >>> Go to question 110                                                                                                                                       |
| 108. If you have the disease, how many years ago did it start? 1) Less than one year ago 2) 1-2 years ago 3) 3-4 years ago 4) 5-6 years ago 5) 7 or more years ago                        |
| 109. When was the last time you went to a doctor for your disease? 1) Less than a month ago 2) 2 to 3 months ago 3) 4 to 6 months ago 4) 7 months to one year ago 5) More than a year ago |
| 110. Do your first degree relatives (father, mother, sister, brother, children) have a history of this disease? 1) Yes 2) No                                                              |
| 111. Alzheimer's disease 1) Yes 2) No >>> Go to question 114                                                                                                                              |
| 112. If you have the disease, how many years ago did it start? 1) Less than one year ago 2) 1-2 years ago 3) 3-4 years ago 4) 5-6 years ago 5) 7 or more years ago                        |
| 113. When was the last time you went to a doctor for your disease? 1) Less than a month ago 2) 2 to 3 months ago 3) 4 to 6 months ago 4) 7 months to one year ago 5) More than a year ago |
| 114. Do your first degree relatives (father, mother, sister, brother, children) have a history of this disease? 1) Yes 2) No                                                              |
| 115. Osteoporosis 1) Yes 2) No >>> Go to question 120                                                                                                                                     |
| 116. If you have the disease, how many years ago did it start? 1) Less than one year ago 2) 1-2 years ago 3) 3-4 years ago 4) 5-6 years ago 5) 7 or more years ago                        |
| 117. Did you have a bone fracture after diagnosis of your osteoporosis? 1) Yes 2) No                                                                                                      |

|                                                                                                                                                                                              |
|----------------------------------------------------------------------------------------------------------------------------------------------------------------------------------------------|
| 118. When was the last time you went to a doctor for your disease? 1) Less than a month ago<br>2) 2 to 3 months ago 3) 4 to 6 months ago 4) 7 months to one year ago 5) More than a year ago |
| 119. Is family history of osteoporosis associated with fractures? 1) Yes 2) No                                                                                                               |
| 120. Do your first degree relatives (father, mother, sister, brother, children) have a history of this disease? 1) Yes 2) No                                                                 |
| 121. Joint pain (arthritis) 1) Yes 2) No >>> Go to question 125                                                                                                                              |
| 122. If you have the disease, which of your joints are affected: 1) Neck 2) Back 3) Waist 4) Knee 5) Small joints of the foot                                                                |
| 123. If you have the disease, how many years ago did it start? 1) Less than one year ago 2) 1-2 years ago 3) 3-4 years ago 4) 5-6 years ago 5) 7 or more years ago                           |
| 124. When was the last time you went to a doctor for your disease? 1) Less than a month ago<br>2) 2 to 3 months ago 3) 4 to 6 months ago 4) 7 months to one year ago 5) More than a year ago |
| 125. Do your first degree relatives (father, mother, sister, brother, children) have a history of this disease? 1) Yes 2) No                                                                 |
| 126. Skin cancer 1) Yes 2) No >> Go to question 129.                                                                                                                                         |
| 127. If you have the disease, how many years ago did it start? 1) Less than one year ago 2) 1-2 years ago 3) 3-4 years ago 4) 5-6 years ago 5) 7 or more years ago                           |
| 128. When was the last time you went to a doctor for your disease? 1) Less than a month ago<br>2) 2 to 3 months ago 3) 4 to 6 months ago 4) 7 months to one year ago 5) More than a year ago |
| 129. Do your first degree relatives (father, mother, sister, brother, children) have a history of this disease? 1) Yes 2) No                                                                 |
| 130. Breast cancer (ask women only) 1. Yes 2. No >> Go to question 133                                                                                                                       |
| 131. If you have the disease, how many years ago did it start? 1) Less than one year ago 2) 1-2 years ago 3) 3-4 years ago 4) 5-6 years ago 5) 7 or more years ago                           |
| 132. When was the last time you went to a doctor for your disease? 1) Less than a month ago<br>2) 2 to 3 months ago 3) 4 to 6 months ago 4) 7 months to one year ago 5) More than a year ago |
| 133. Do your first degree relatives (father, mother, sister, brother, children) have a history of this disease? 1) Yes 2) No                                                                 |
| 134. Lung cancer 1) Yes 2) No >>> Go to question 137                                                                                                                                         |
| 135. If you have the disease, how many years ago did it start? 1) Less than one year ago 2) 1-2 years ago 3) 3-4 years ago 4) 5-6 years ago 5) 7 or more years ago                           |
| 136. When was the last time you went to a doctor for your disease? 1) Less than a month ago<br>2) 2 to 3 months ago 3) 4 to 6 months ago 4) 7 months to one year ago 5) More than a year ago |
| 137. Do your first degree relatives (father, mother, sister, brother, children) have a history of this disease? 1) Yes 2) No                                                                 |
| 138. Colon cancer 1. Yes 2. No >>> Go to question 141                                                                                                                                        |
| 139. If you have the disease, how many years ago did it start? 1) Less than one year 2) 1-2 years ago 3) 3-4 years ago 4) 5-6 years ago 5) 7 or more years ago                               |
| 140. When was the last time you went to a doctor for your disease? 1) Less than a month ago<br>2) 2 to 3 months ago 3) 4 to 6 months ago 4) 7 months to one year ago 5) More than a year ago |

|                                                                                                                                                                                                 |
|-------------------------------------------------------------------------------------------------------------------------------------------------------------------------------------------------|
| 141. Do your first degree relatives (father, mother, sister, brother, children) have a history of this disease? 1) Yes 2) No                                                                    |
| 142. Stomach cancer            1. Yes                    2. No >> Go to question 145                                                                                                            |
| 143. If you have the disease, how many years ago did it start? 1) Less than one year ago   2) 1-2 years ago   3 ) 3-4 years ago   4) 5-6 years ago   5) 7 or more years ago                     |
| 144. When was the last time you went to a doctor for your disease?1) Less than a month ago 2) 2 to 3 months ago   3) 4 to 6 months ago   4) 7 months to one year ago   5) More than a year ago  |
| 145 Do your first degree relatives (father, mother, sister, brother, children) have a history of this disease? 1) Yes 2) No                                                                     |
| 146. Colorectal cancer            1. Yes                    2. No >>> Go to question 149                                                                                                        |
| 147. If you have the disease, how many years ago did it start? 1) Less than one year ago   2) 1-2 years ago   3 ) 3-4 years ago   4) 5-6 years ago   5) 7 or more years ago                     |
| 148. When was the last time you went to a doctor for your disease? 1) Less than a month ago 2) 2 to 3 months ago   3) 4 to 6 months ago   4) 7 months to one year ago   5) More than a year ago |
| 149. Do your first degree relatives (father, mother, sister, brother, children) have a history of this disease? 1) Yes 2) No                                                                    |

|                                                                                                                                                                                                 |
|-------------------------------------------------------------------------------------------------------------------------------------------------------------------------------------------------|
| 150. Prostate cancer (Ask men only) 1. Yes            2. No >> Go to question 153                                                                                                               |
| 151. If you have the disease, how many years ago did it start? 1) Less than one year ago   2) 1-2 years ago   3 ) 3-4 years ago   4) 5-6 years ago   5) 7 or more years ago                     |
| 152. When was the last time you went to a doctor for your disease? 1) Less than a month ago 2) 2 to 3 months ago   3) 4 to 6 months ago   4) 7 months to one year ago   5) More than a year ago |
| 153. Do your first degree relatives (father, mother, sister, brother, children) have a history of this disease? 1) Yes 2) No                                                                    |
| 154. Ovarian cancer (Ask women only)            1. Yes            2. No >> Go to question 157                                                                                                   |
| 155. If you have the disease, how many years ago did it start? 1) Less than one year ago   2) 1-2 years ago   3 ) 3-4 years ago   4) 5-6 years ago   5) 7 or more years ago                     |
| 156. When was the last time you went to a doctor for your disease? 1) Less than a month ago 2) 2 to 3 months ago   3) 4 to 6 months ago   4) 7 months to one year ago   5) More than a year ago |
| 157. Do your first degree relatives (father, mother, sister, brother, children) have a history of this disease? 1) Yes 2) No                                                                    |
| <b>(F) surgery questions:</b>                                                                                                                                                                   |
| 158. Have you had a bladder surgery?    1. Yes                    2. No >> Go to question 160                                                                                                   |
| 159. Your age at the time of surgery: 1) Below 30 years   2) 30-39 years   3) 40-49 years   4) 50-59 years   5) 60 years and above                                                              |
| 160. Have you had a kidney stone surgery?    1) Yes                    2) No >> Go to question 162                                                                                              |
| 161. Your age at the time of surgery:    1) Below 30 years   2) 30-39 years   3) 40-49 years   4) 50-59 years   5) 60 years and above                                                           |
| 162. Have you had a knee replacement surgery?            1) Yes            2) No >> Go to question 164                                                                                          |
| 163. Your age at the time of surgery: 1) Below 30 years   2) 30-39 years   3) 40-49 years   4) 50-59 years   5) 60 years and above                                                              |
| 164. Have you had a hip surgery? 1. Yes 2. No >> Go to question 166                                                                                                                             |



|                                                                                                                                                                                  |
|----------------------------------------------------------------------------------------------------------------------------------------------------------------------------------|
| 165. Your age at the time of surgery: 1) Below 30 years 2) 30-39 years 3) 40-49 years<br>4) 50-59 years 5) 60 years and above                                                    |
| 166. Have you had a gallbladder surgery? 1. Yes 2. No >> Go to question 168                                                                                                      |
| 167. Your age at the time of surgery: 1) Below 30 years 2) 30-39 years 3) 40-49 years<br>4) 50-59 years 5) 60 years and above                                                    |
| 168. Have you had an open heart surgery? 1. Yes 2. No >> Go to question 170                                                                                                      |
| 169. Your age at the time of surgery: 1) Below 30 years 2) 30-39 years 3) 40-49 years<br>4) 50-59 years 5) 60 years and above                                                    |
| 170. During the past month, did you have pain in the joints of your neck? 1) Yes 2) No                                                                                           |
| 171. During the past month, did you have pain in the joints of your back? 1) Yes 2) No                                                                                           |
| 172. During the past month, did you have pain in your knee joints? 1) Yes 2) No                                                                                                  |
| 173. During the past month, did you have a history of gout (pain in the small joints of the<br>foot)? 1) Yes 2) No                                                               |
| 174. Total number of days in your life that you have been hospitalized? 1) Never 2) 1-10<br>days 3) 11-20 days 4) 21-30 days 5) More than one month                              |
| 175. If you were hospitalized in the first 6 months of 2013, how was your satisfaction level<br>with the health services? 1) Very good 2) Good 3) Moderate 4) Bad 5) Very<br>bad |
| 176. If you were admitted in hospital on 5 May 2014, how was your satisfaction level with the<br>health services? 1) Very good 2) Good 3) Moderate 4) Bad 5)<br>Very bad         |
| 177. Over the past year, how many times have you gone to a doctor? 1) Never 2) 1<br>3) 2 4) 3-4 5) 6 and more                                                                    |
| 178. Over the past year, how many times have you gone to a specialist? 1) Never 2) 1 3)<br>2 4) 3-4 5) 6 and more                                                                |
| 179. If you get sick, where will you refer for the first time? 1) Health centers (clinics) 2)<br>General practitioner 3) Specialist 4) Fellowship 5) Traditional practitioner    |
| <b>G. Oral and dental questions:</b>                                                                                                                                             |
| 180. How many times a day do you use toothbrush? 1) Never 2) Once a day 3) Twice a<br>day 4) Three times a day 5) Some times                                                     |
| 181. Do you use dental floss? 1. Yes 2. No 3.) Occasionally                                                                                                                      |
| 182. Do you have full dentures? 1. Yes 2. No                                                                                                                                     |
| 183. How many of your teeth are artificial? 1) None 2) 1-2 3) 3-4 4) 5-6 5) 7 and<br>more                                                                                        |
| 184. Number of drawn teeth? 1) None 2) 1-3 3) 4-6 4) 7-8 5) 9 and more                                                                                                           |
| 185. The number of filled teeth (approximately)? 1) None 2) 1-3 3) 4-6 4) 7-8 5) 9<br>and more                                                                                   |
| 186. How often do you go to a dentist on average? 1) Never 2) In case of pain 3) at<br>regularly examination period 4) Once a year 5) 2-3 times a year                           |
| <b>H- Accidents</b>                                                                                                                                                              |
| <b>In the past year, which of the following events happened to you?</b>                                                                                                          |
| 187. 1) Traffic accident 2) Fall 3) Drowning 4) Scoot                                                                                                                            |
| 188. 1) Poisoning 2) Burn 3) Animal bites 4) Attempt for suicide 5) Fall into a pit                                                                                              |
| 189. 1) Electric shock 2) Work-related incident 3) Bone fractures 4) Dealing with sharp<br>objects 5) None>> Go to question 195                                                  |

|                                                                                                                                                                                                                               |
|-------------------------------------------------------------------------------------------------------------------------------------------------------------------------------------------------------------------------------|
| <b>Your status in traffic accident:</b>                                                                                                                                                                                       |
| 190. 1) Motorcyclist 2) Pedestrian 3) Driver of cargo or private cars 4) Passenger of private cars 5) Passenger of cargo vehicles                                                                                             |
| 191. 1) Bus driver 2) Minibus driver 3) Lorry driver 4) Passenger of bus or minibus 5) Cyclist                                                                                                                                |
| <b>The front vehicle in the accident was:</b>                                                                                                                                                                                 |
| 192. 1) Private car 2) Goods van 3) Motorcycle 4) Bus 5) Minibus                                                                                                                                                              |
| 193. 1) Truck 2) Bicycle 3) Fixed objects 4) Other                                                                                                                                                                            |
| 194. The result of the accident 1) Recovered without referring to medical centers 2) Discharged after examination 3) Under treatment 4) Recovered 5) Disabled                                                                 |
| 195. How do you go to work? 1) Personal car 2) Motorcycle 3) Bicycle 4) Walking 5) Public transportation                                                                                                                      |
| 196. Do you fasten your seat belt when using a private or public vehicle? 1) Only in my personal car 2. Only in public vehicles 3. Both 4. None                                                                               |
| <b>I - FAQ habits</b>                                                                                                                                                                                                         |
| 197. What do you often drink with food? 1) Mineral water 2) Carbonated drinks 3) Juice 4) Yogurt 5) Tap water                                                                                                                 |
| 198. How often do you drink carbonated beverages? 1) Never 2) Less than once a week 3) 2-1 times a week 4) 3-4 times a week 5) 5 or more times a week                                                                         |
| 199. How often do you use sweetened drinks with sugar, such as homemade syrup and packaging juice? 1) Never 2) Less than once a week 3) Once a week 4) 2-3 times a week 5) 4 or more times a week                             |
| 200. What is the main reason for you to use fast food? (Mark only one answer from the 10 options) 1) Children's tendency 2) Excessive work 3) Flavorful and good taste 4) rapid cooking 5) Cheapness and availability         |
| 201. 1) Advertising 2) As a hobby 3) Possibility of being with family and friends 4) Other 5) I do not eat fast food                                                                                                          |
| 202. On average, how much do you spend on fast food every month? 1) None 2) Less than 50 thousand Tomans 3) 50-100 thousand Tomans 4) 101-150 thousand Tomans 5) More than 150 thousand Tomans or you can write \$ equivalent |
| <b>How often do you use the food categories listed below?</b>                                                                                                                                                                 |
| 203. Hamburgers, hot dogs, sausages, pizza: 1) Once a day 2) 1-3 times a week 3) 1-3 times a month 4) 4-10 times a year 5) Never                                                                                              |
| 204. French fries, Samosa, falafel, nugget: 1) Once a day 2) 1-3 times a week 3) 1-3 times a month 4) 4-10 times a year 5) Never                                                                                              |
| 205. Olivier salad: 1) Once a day 2) 1-3 times a week 3) 1-3 times a month 4) 4-10 times a year 5) Never                                                                                                                      |
| 206. Canned food: : 1) Once a day 2) 1-3 times a week 3) 1-3 times a month 4) 4-10 times a year 5) Never                                                                                                                      |
| 207. How often do you eat breakfast: 1) Never 2) Once a week 3) 2-3 times a week 4) 4-5 times a week 5) Every day                                                                                                             |
| <b>Typically, how many times a week you use the following foods:</b>                                                                                                                                                          |
| 208. Egg: 1) Never 2) Once 3) 2-3 times 4) 4-5 times 5) Every day                                                                                                                                                             |
| 209. Meat: 1) Never 2) Once 3) 2-3 times 4) 4-5 times 5) Every day                                                                                                                                                            |
| 210. Chicken: 1) Never 2) Once 3) 2-3 times 4) 4-5 times 5) Every day                                                                                                                                                         |
| 211. Beans: 1) Never 2) Once 3) 2-3 times 4) 4-5 times 5) Every day                                                                                                                                                           |
| 212. How do you usually cook fish? 1) Frying 2) boiling / steaming 3) Barbecuing                                                                                                                                              |

|                                                                                                                                                                                                                                                               |
|---------------------------------------------------------------------------------------------------------------------------------------------------------------------------------------------------------------------------------------------------------------|
| 4) Baking in oven 5) Other                                                                                                                                                                                                                                    |
| 213. How many times a day do you eat candies (size of a sugar cube and more)? 1) Not at all<br>2) Once 3) 2-3 times 4) 4-6 times 5) 7 and more times                                                                                                          |
| 214. How many times a day do you eat middle-sized sugar cubes? 1) Not at all 2) 1-2 times<br>3) 3-4 times 4) 5-8 times 5) 9 and more times                                                                                                                    |
| 215. How many times a week do you use fried food? 1) Not at all 2) Once 3) 2-3 times<br>4) 3-4 times 5) 5 and more times                                                                                                                                      |
| 216. What kind of oil do you usually use for cooking at home? 1) Vegetable oil 2) Animal<br>fat or butter<br>3) Animal oil 4) Olive oil, sesame oil 5) other liquid oils                                                                                      |
| 217. What method of cooking do you use most? 1) Boiling 2) Frying 3) Barbecuing<br>4) Cooking in the oven 5) Steaming                                                                                                                                         |
| 218. How many times a week do you eat cakes, muffins, and biscuits? 1) Not at all 2) Once<br>3) 2-3 times 4) 3-4 times 5) 5 and more times                                                                                                                    |
| 219. How many times a week do you eat snacks, such as potato chips and crunchy? 1) Not at<br>all 2) Once 3) 2-3 times 4) 3-4 times 5) 5 and more times                                                                                                        |
| 220. If each unit of vegetables equals to half a cup of cooked vegetables or one cup of raw<br>vegetables or salad, how many units of vegetables do you averagely consume per day? 1) Not<br>at all 2) One unit 3) 2-3 units 4) 4-5 units 5) 6 and more units |

|                                                                                                                                                                                                                                                                        |
|------------------------------------------------------------------------------------------------------------------------------------------------------------------------------------------------------------------------------------------------------------------------|
| 222. If each unit of fruit equals to a medium size fruit, two small size fruits, one cup<br>of chopped fruit, or half a glass of fruit juice, how many units of fruit do you consume a day?<br>1) Not at all 2) One unit 3) 2-3 units 4) 4-5 units 5) 6 and more units |
| 223. How much fat do you remove from meat before eating or cooking meat foods?<br>1) All visible fat<br>2) Most visible fat 3) Little visible fat 4) I do not remove fat 5) I do not eat meat                                                                          |
| 224. Do you remove chickens' skin before cooking or eating it? 1) Never 2) Occasionally 3)<br>Sometimes 4) Usually 5) Always                                                                                                                                           |
| 225. How many glasses of water do you drink every day? 1) None 2) 1-3 glasses 3) 4-6<br>glasses 4) 7-8 glasses 5) 9 and more glasses                                                                                                                                   |
| 226. How many glasses of milk do you drink every week? 1) None 2) 1-2 3) 3-4 4) 5-6<br>5) 7 and more                                                                                                                                                                   |
| 227. How many cups of yogurt you eat every week? 1) None 2) 1-2 3) 3-4 4) 5-6 5)<br>7 and more                                                                                                                                                                         |
| 228. How many times a week do you eat cheese? 1) Not at all 2) Once 3) 2 times<br>4) 3 times 5) 4 and more times                                                                                                                                                       |
| 229. Over the past year, what kind of dairy products have you consumed? 1) Uncontrolled fat<br>dairy products 2) Dairy products with averagely 3% fat 3) Low fat, 1.5 to 2% fat 4)<br>Do not know 5) I do not use dairy products                                       |
| 230. Which of the following medications or supplements have you used during the past<br>month?<br>1) Iron supplement 2) Calcium supplement 3) Vitamin supplement 4) Other<br>supplements 5) None >> Go to question 23                                                  |
| 231. Were the above medications prescribed by a doctor? 1) Yes 2) No                                                                                                                                                                                                   |
| 232. Do you put salt on the table? 1) Yes 2) No                                                                                                                                                                                                                        |
| 233. Do you use module spoonto add salt in cooking? 1) Yes 2) No 3) I do not know                                                                                                                                                                                      |
| J. Occupation                                                                                                                                                                                                                                                          |

|                                                                                                                                                                                                                                                                                                                                                                                                                                                                                                                               |
|-------------------------------------------------------------------------------------------------------------------------------------------------------------------------------------------------------------------------------------------------------------------------------------------------------------------------------------------------------------------------------------------------------------------------------------------------------------------------------------------------------------------------------|
| 234. are you employed: 1) Yes 2) Housewife 3) No>> Go to question 237                                                                                                                                                                                                                                                                                                                                                                                                                                                         |
| 235. If the answer is "yes", how many hours a day do you work? 1) Less than one hour 2) 1 to 3 hours 3) 4 to 6 hours 4) 7 to 9 hours 5) More than 9 hours                                                                                                                                                                                                                                                                                                                                                                     |
| 236. Your occupation type: 1) Governmental 2) Private 3) Technical Jobs 4) Service jobs 5) Unpaid jobs                                                                                                                                                                                                                                                                                                                                                                                                                        |
| 237. What kind of insurance do you use:<br>1) I do not have insurance 2) Medical services insurance 3) Social security insurance 4) Iranian national insurance 5) Others                                                                                                                                                                                                                                                                                                                                                      |
| 238. How many hours do you usually sit at home every day? 1) Less than one hour 2) 1-3 hours 3) 4-6 hours 4) 7-9 hours 5) 10 hours or more                                                                                                                                                                                                                                                                                                                                                                                    |
| 239. How many hours do you usually sit down at work or in public or private motor vehicles every day? 1) Less than one hour 2) 1 to 3 hours 3) 4 to 6 hours 4) 7-9 hours 5) More than 9 hours                                                                                                                                                                                                                                                                                                                                 |
| 240. How many hours a day do you spend on the Internet? 1) Never 2) Less than 30 minutes 3) 30-60 minutes 4) 1-3 hours 5) 4 hours and more                                                                                                                                                                                                                                                                                                                                                                                    |
| 241. How many hours a day do you spend on talking with others on using (Viber, Tango, WhatsApp)? 1) Never 2) Less than 30 minutes 3) 30-60 minutes 4) 1-3 hours 5) 4 hours and more                                                                                                                                                                                                                                                                                                                                           |
| <b>K- Traditional medicine questions</b>                                                                                                                                                                                                                                                                                                                                                                                                                                                                                      |
| 242. Have you ever referred to a traditional practitioner? 1) Yes 2) No >>> Go to question 254                                                                                                                                                                                                                                                                                                                                                                                                                                |
| 243. Which of the following therapies of traditional medicine have you used?<br>1) Herbal tradition 2) Traditional medicine diet 3) Massage therapy 4) Blood-letting 5) Others                                                                                                                                                                                                                                                                                                                                                |
| 244. 1) Cupping 2) Hirudo therapy 3) FASD 4) Hydrotherapy                                                                                                                                                                                                                                                                                                                                                                                                                                                                     |
| 245. To improve which of the following diseases did you use the above methods? (Only one answer) 1) Diabetes 2) Hypertension 3) High fat 4) Fatty liver 5) Headache (migraine)                                                                                                                                                                                                                                                                                                                                                |
| 246. 1) Joint pain 2) Obesity 3) Women's disorders 4) Skin disorders 5) Psychiatric disorders                                                                                                                                                                                                                                                                                                                                                                                                                                 |
| 247. How many times did you use this method? 1) Once 2) Twice 3) 3 times 4) Four times 5) Five and more times                                                                                                                                                                                                                                                                                                                                                                                                                 |
| 248. Who recommended using traditional medicine to you? 1) Friends and family 2) Apothecary (Attar) 3) Traditional practitioner (Hakim) 4) GP 5) Specialist                                                                                                                                                                                                                                                                                                                                                                   |
| 249. Does your healthcare provider (modern medicine) know about your traditional medicine treatment? 1) Yes 2) No                                                                                                                                                                                                                                                                                                                                                                                                             |
| 250. If your doctor does not know about your traditional medicine treatment, what is the reason?<br>1) Fear from the conventional medicine physician's inappropriate behavior<br>2) Fear from the conventional medicine physician's discomfort<br>3) Fear from the conventional medicine physician's inattention because of reference to the traditional medicine specialist 4) Fear from being rejected by the conventional medicine doctor<br>5) Fear from discontinuation of treatment by the conventional medicine doctor |
| 251. Are you aware of the effects of traditional medicine? 1) Yes 2) No                                                                                                                                                                                                                                                                                                                                                                                                                                                       |
| 252. In the past year, which medicinal plants have you used? 1) Thyme, chamomile flowers, properties 2) Sisymbrium irio, Borage, 3) Lavender 4) Valerian                                                                                                                                                                                                                                                                                                                                                                      |



|                                                                                                                                                                                               |                       |
|-----------------------------------------------------------------------------------------------------------------------------------------------------------------------------------------------|-----------------------|
| 3) 21-34 years                                                                                                                                                                                | 4) 35 years and above |
| 279. Your age at the last delivery. 1) Less than 15 years 2) 16-20 years 3) 21-34 years 4) 35 years and above                                                                                 |                       |
| 280. Did you have a miscarriage or stillbirth? 1. Yes 2. No                                                                                                                                   |                       |
| 281. If yes, how many? 1) 1 2) 2 3) 3 4) 4 and more                                                                                                                                           |                       |
| 282. Are you currently pregnant? 1) Yes 2) No 3) I am not sure                                                                                                                                |                       |
| 283. Did you present with any of the following side effects in your previous pregnancy?<br>1) Premature delivery 2) Gestational hypertension 3) Gestational diabetes<br>4) Placental delivery |                       |
| 284. If you had postpartum hemorrhage, how were you treated? 1) Removing the uterus<br>2) Drug therapy                                                                                        |                       |
| 285. Which one of the following screening tests have you done? 1) Pap smear<br>2) Mammography 3) Ultrasound (other than pregnancy ultrasound) 4) None                                         |                       |
| 286. Do you have a family history of infertility (sister, mother, daughter, aunt, daughter, uncle, etc.)? 1. Yes 2. No                                                                        |                       |
| 287. Have you had infertility problems (one year absence of pregnancy without contraceptive methods)? 1. Yes 2. No                                                                            |                       |
| 288. Is your infertility primary (you do not get pregnant) or secondary (pregnancy will not be delivered)? 1) Primary 2) Secondary                                                            |                       |
| 289. What is your infertility problem? 1) Male 2) Female 3) Both 4) None                                                                                                                      |                       |
| 290. How long did you breastfeed your children? 1) I did not breastfeed my children<br>2) 6 months or less 3) 6-11months 4) 12 months and more                                                |                       |
| 291. Did you use contraceptive methods? 1) Yes 2) No                                                                                                                                          |                       |
| 292. What method of contraception did you use most?<br>1) Hormones (pills, injectable) 2) IUD 3) Condoms 4) Natural way                                                                       |                       |
| 293. Are you divorced? 1) Yes 2) No                                                                                                                                                           |                       |
| 294. Have you had ectopic pregnancy? 1) No 2) 1 3) 2 4) 3 and more                                                                                                                            |                       |
| 295. Have you had hysterectomy? 1. Yes 2. No                                                                                                                                                  |                       |
| 296. Your age at the time of surgery: 1) Less than 30 years 2) 30-39 years 3) 40-49 years<br>4) 50 years and above                                                                            |                       |
| 297. Did you have surgery for removing the ovaries? 1. Yes 2. No                                                                                                                              |                       |
| 298. Your age at the time of surgery: 1) Less than 30 years 2) 30-39 years 3) 40-49<br>years 4) 50 years and above                                                                            |                       |
| 299. Have you had a tubal ligation to prevent pregnancy? 1. Yes 2. No                                                                                                                         |                       |
| 300. Your age at the time of surgery: 1) Less than 30 years 2) 30-39 years 3) 40-49 years<br>4) 50 years and above                                                                            |                       |
